# Supplementary material for: Inflammatory conversion of quiescent osteoblasts by metastatic breast cancer cells through pERK1/2 aggravates cancer-induced bone destruction
Source: PubMed Central journal article supplement (PMC8481290; doi:10.1038/s41413-021-00158-w), 2021-09-29
Supplement: 41413_2021_158_MOESM2_ESM.pdf [file 41413_2021_158_MOESM2_ESM.pdf]

**a**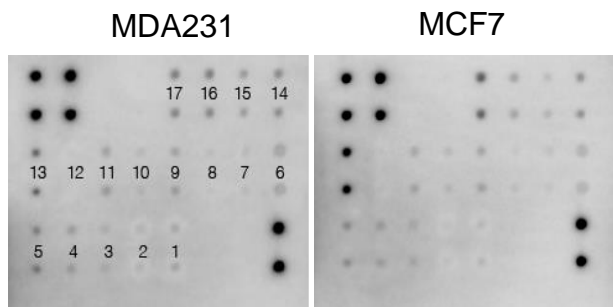**Raybiotech**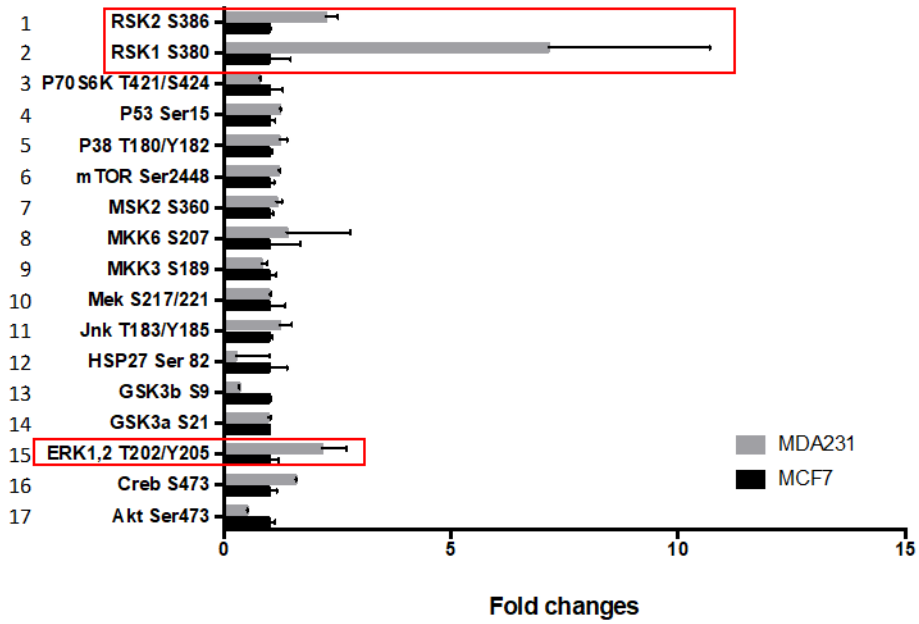**b**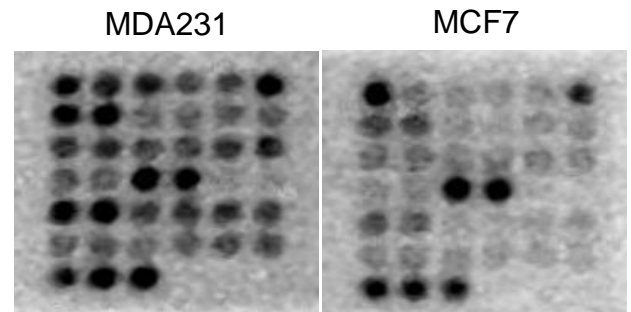**Cell signaling-columbia**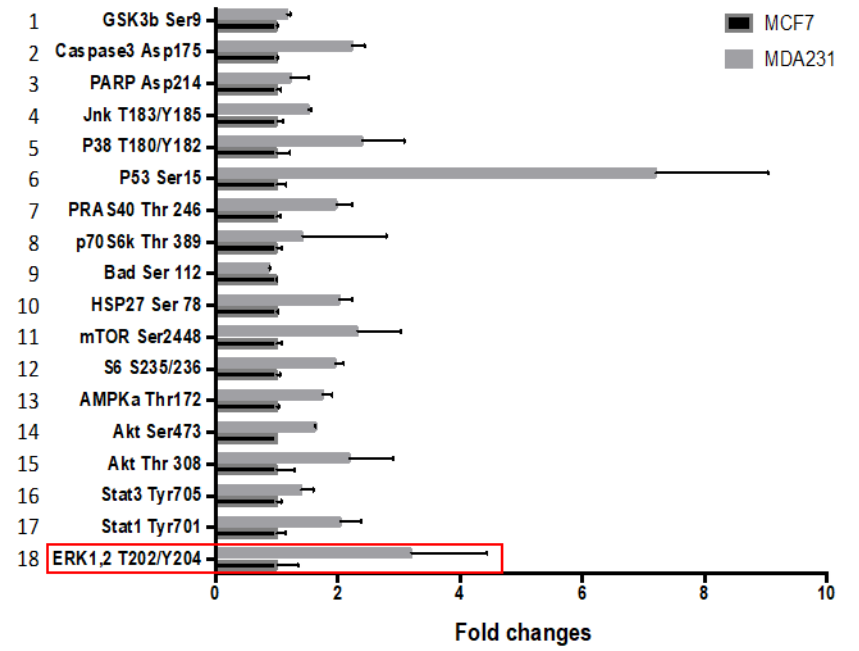

**a**

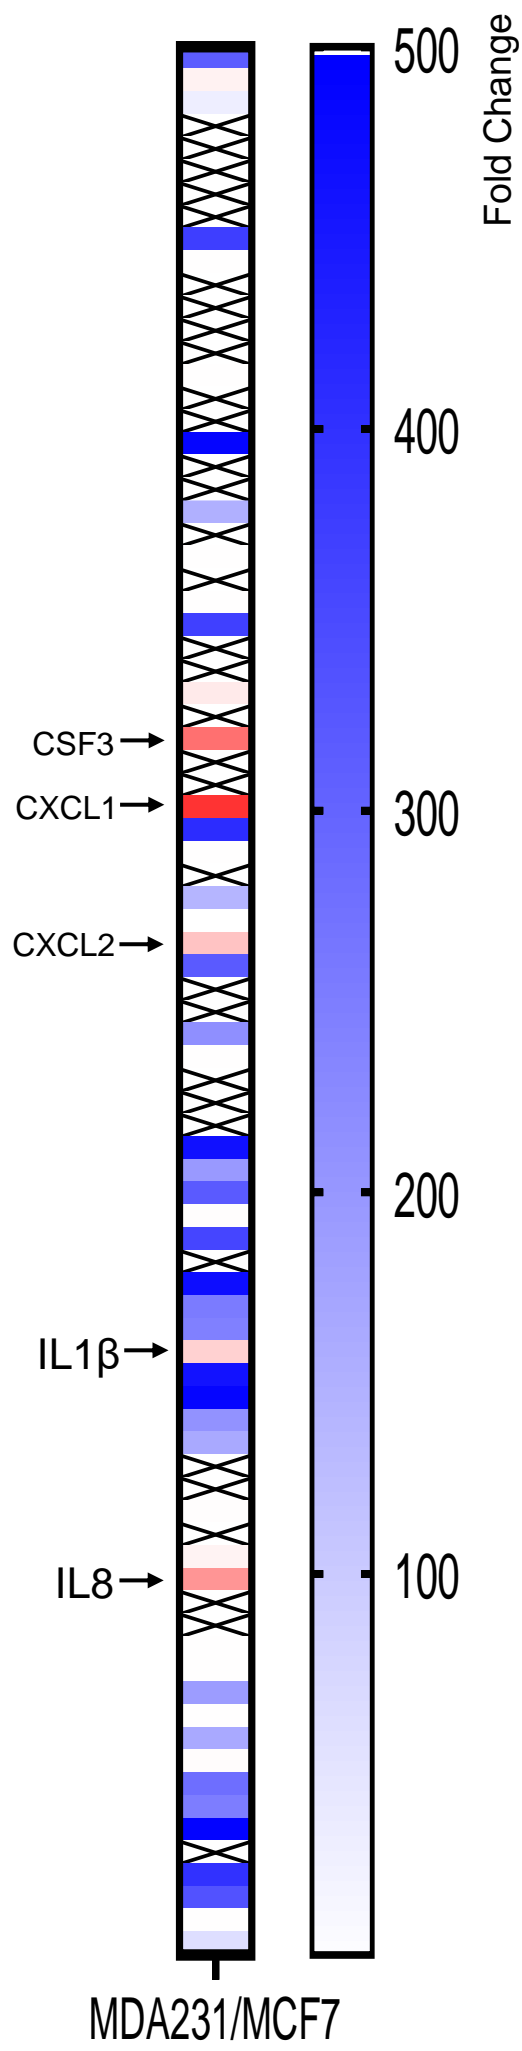

**b**

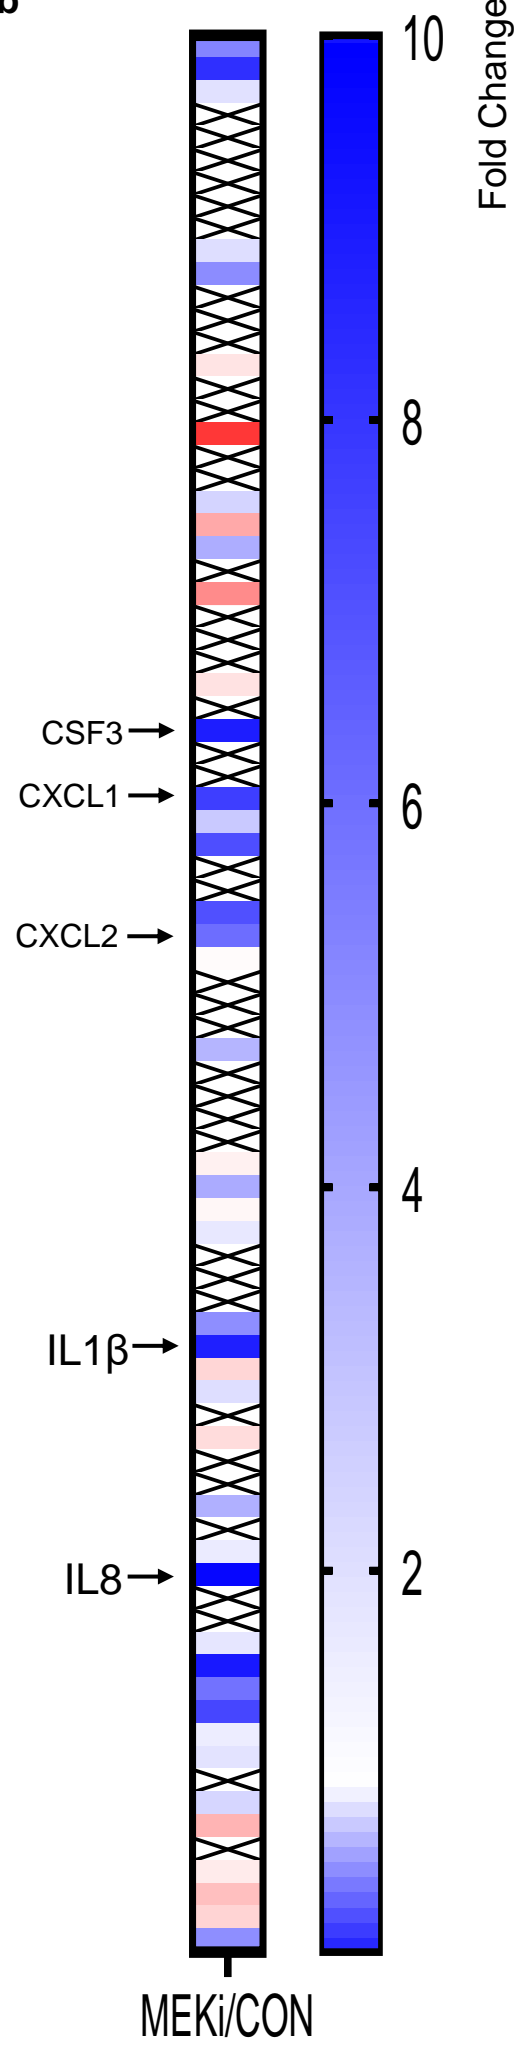

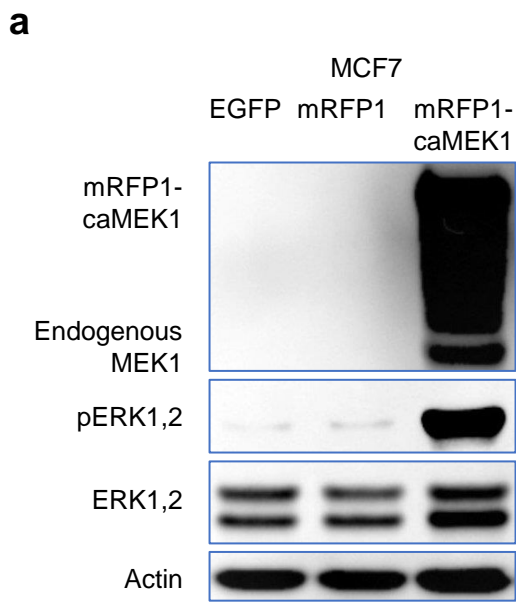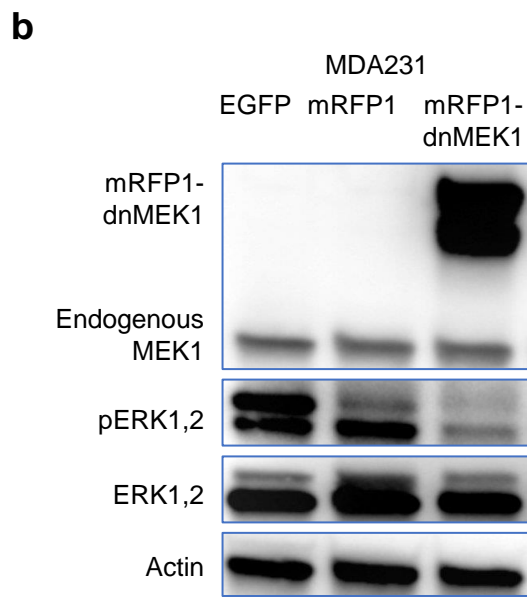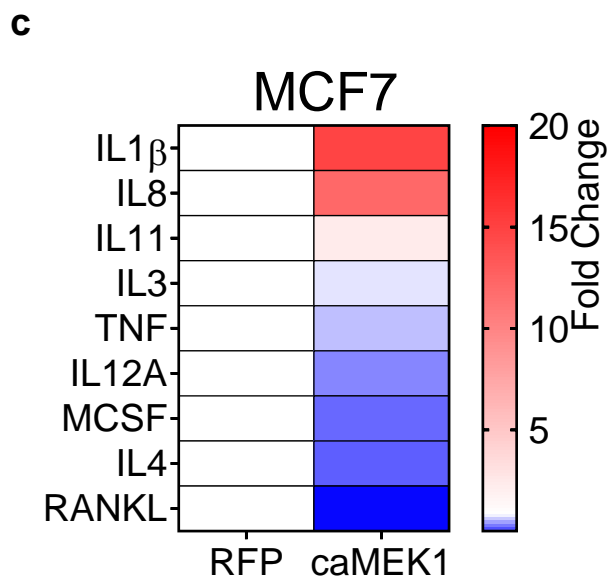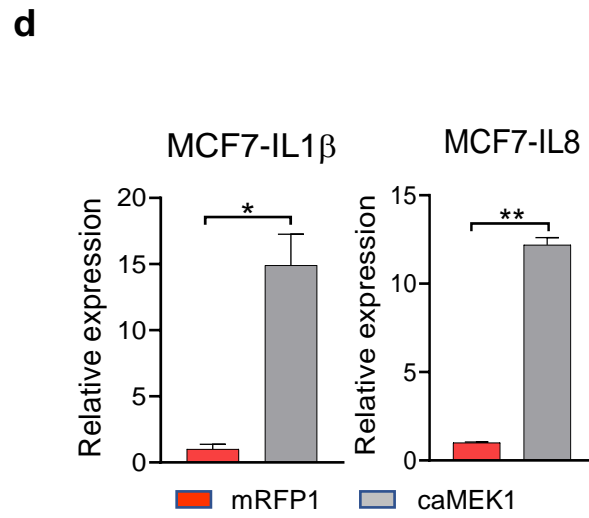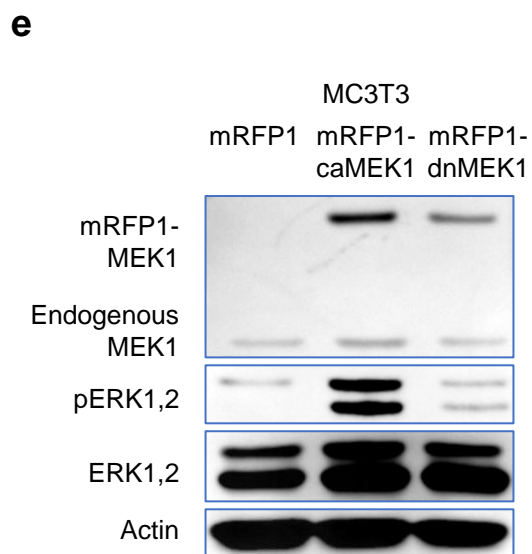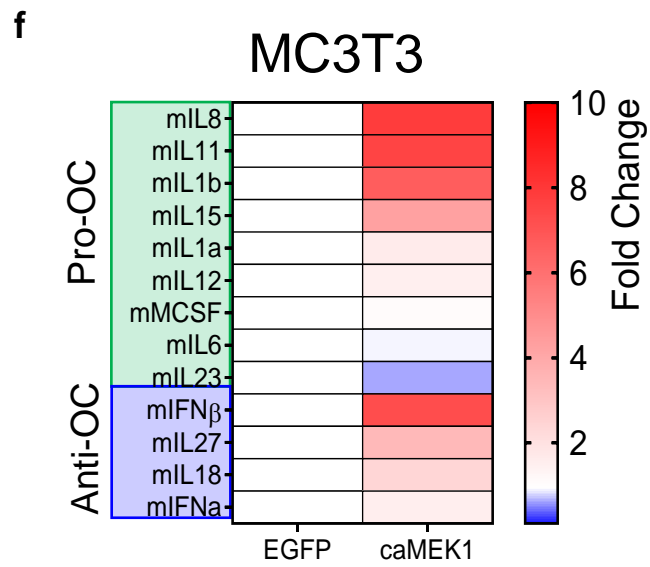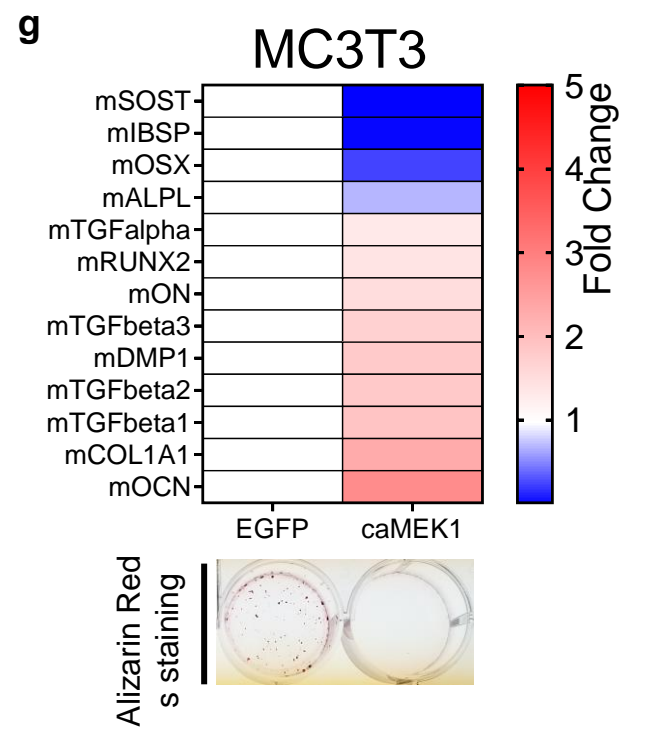

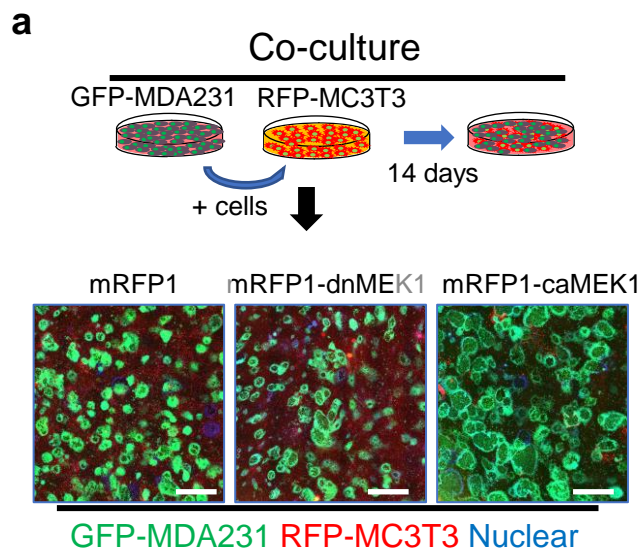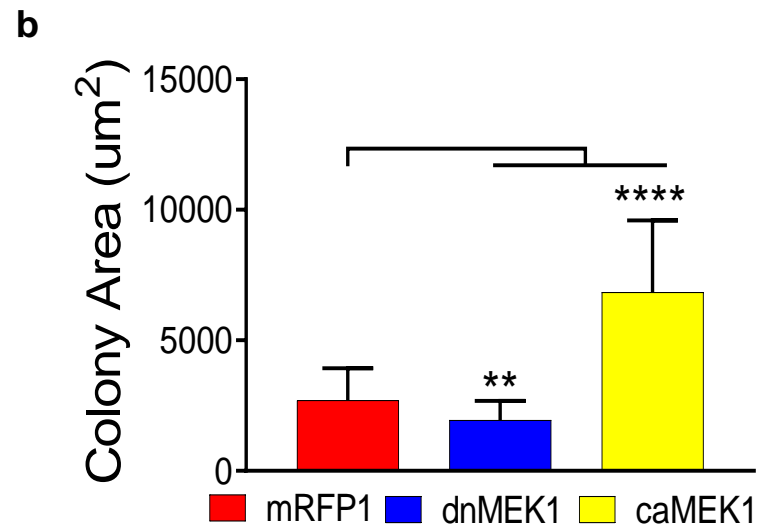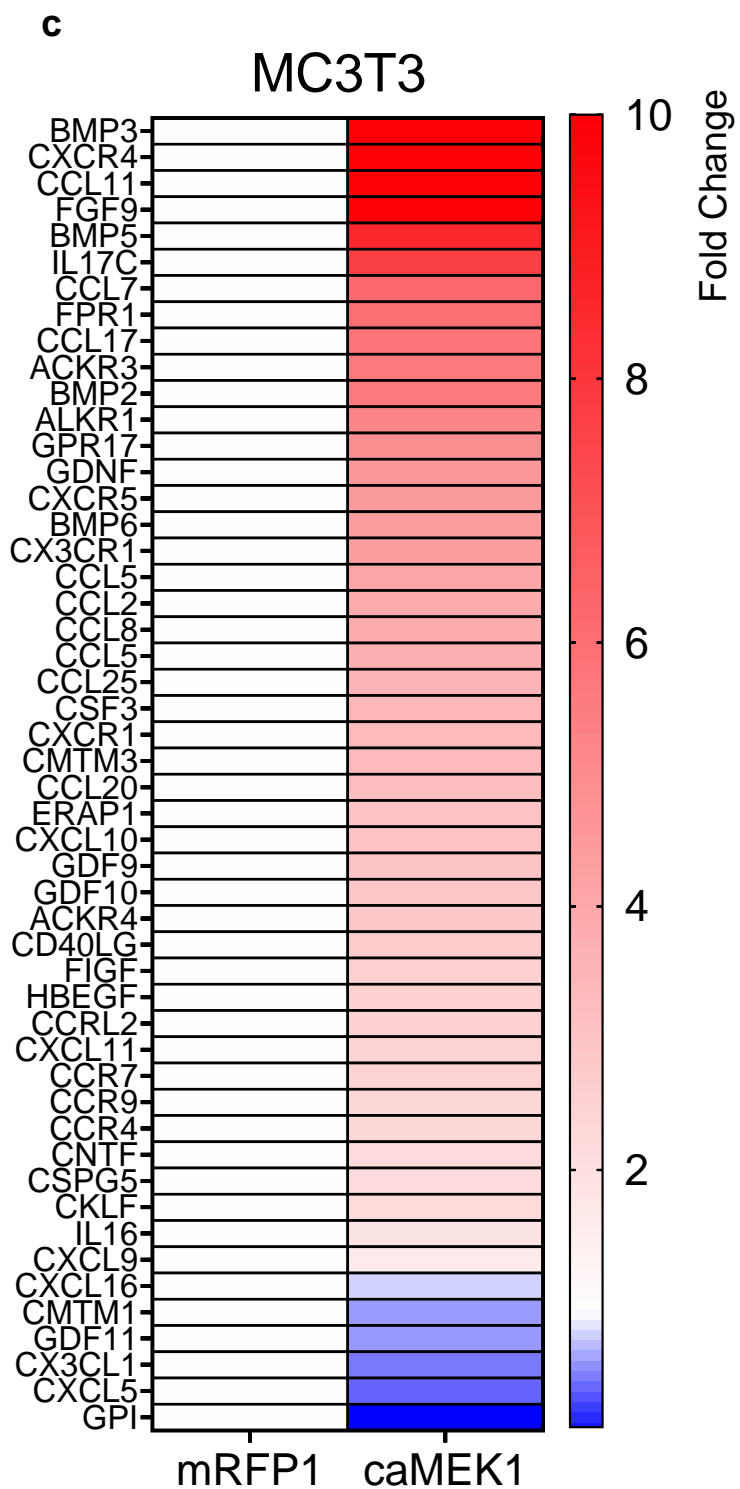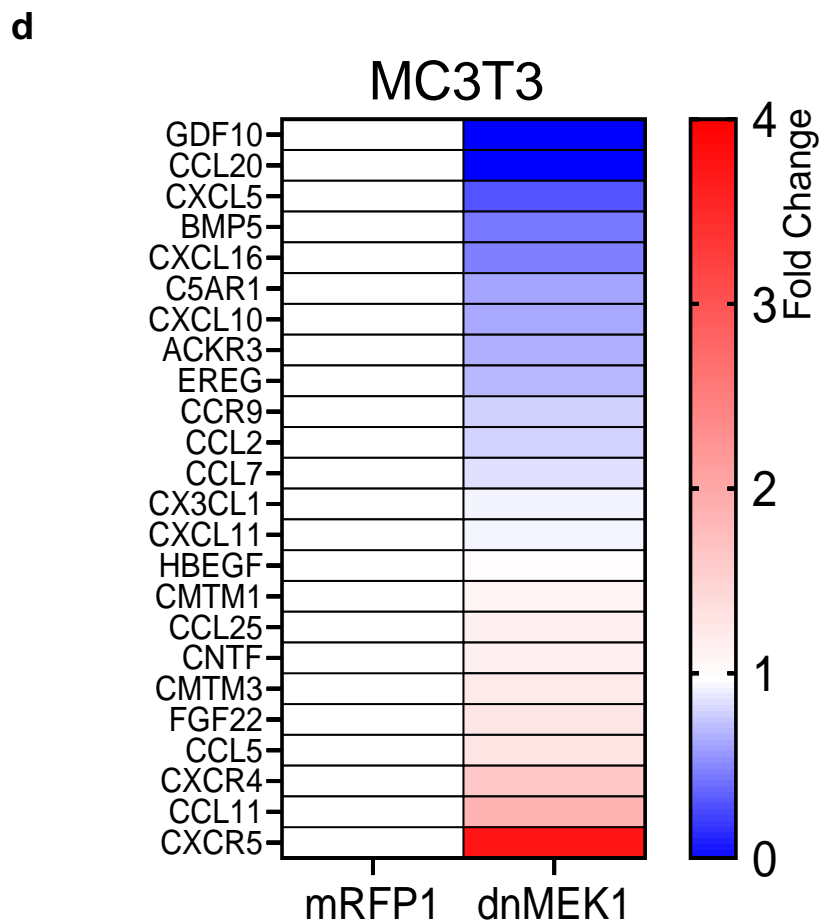

**a**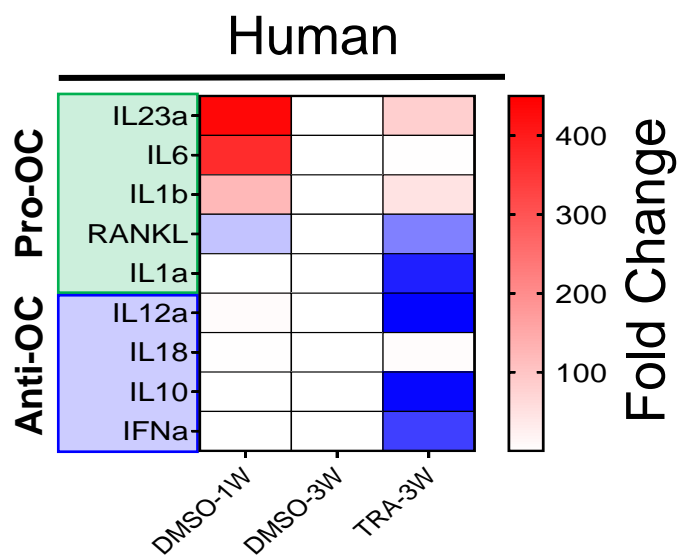**b**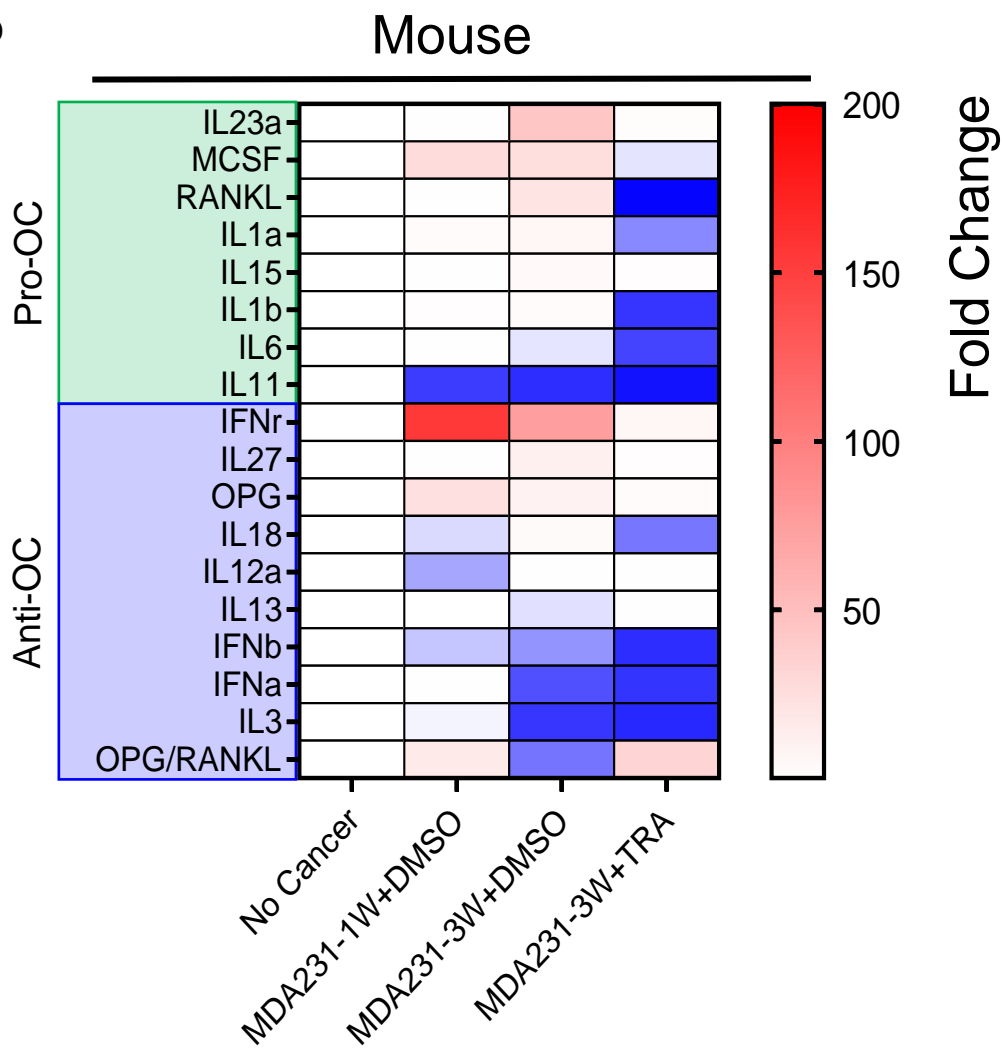



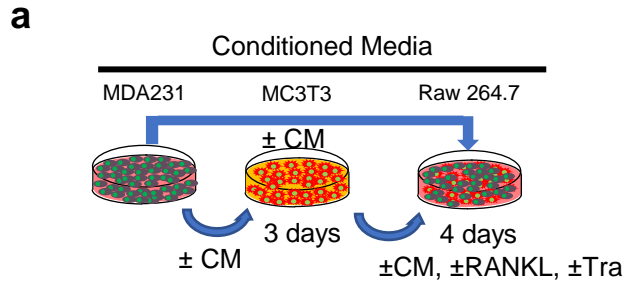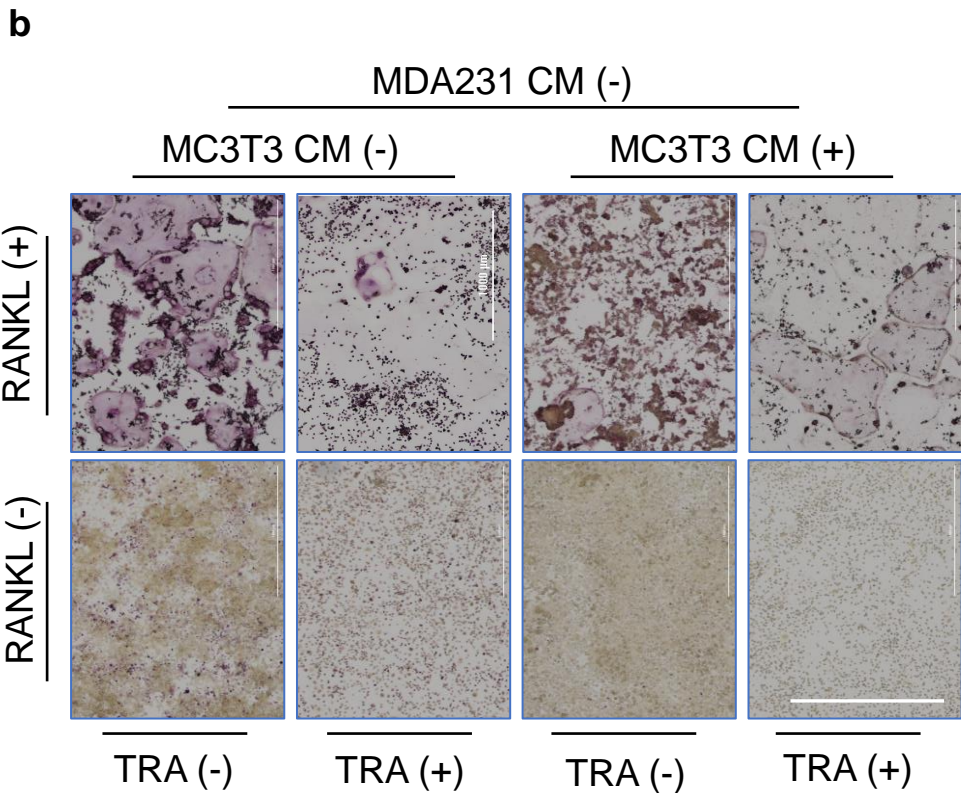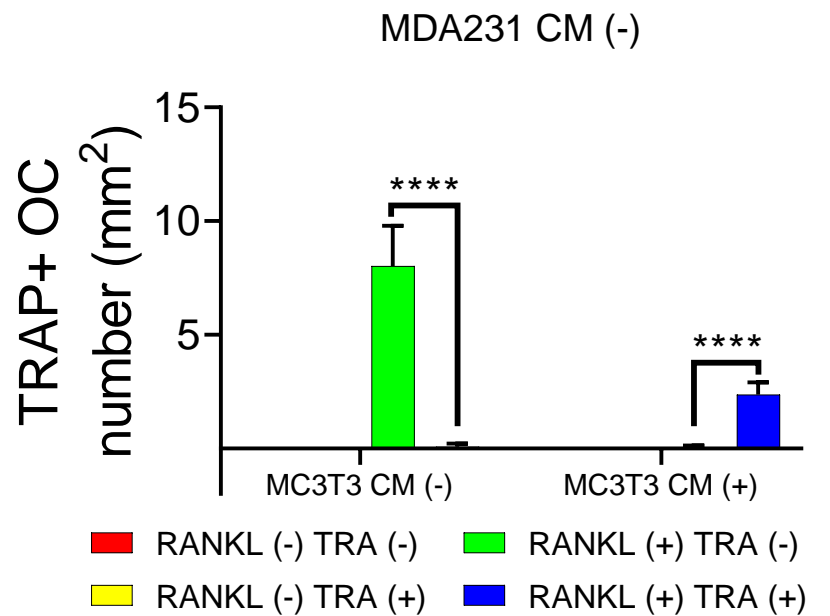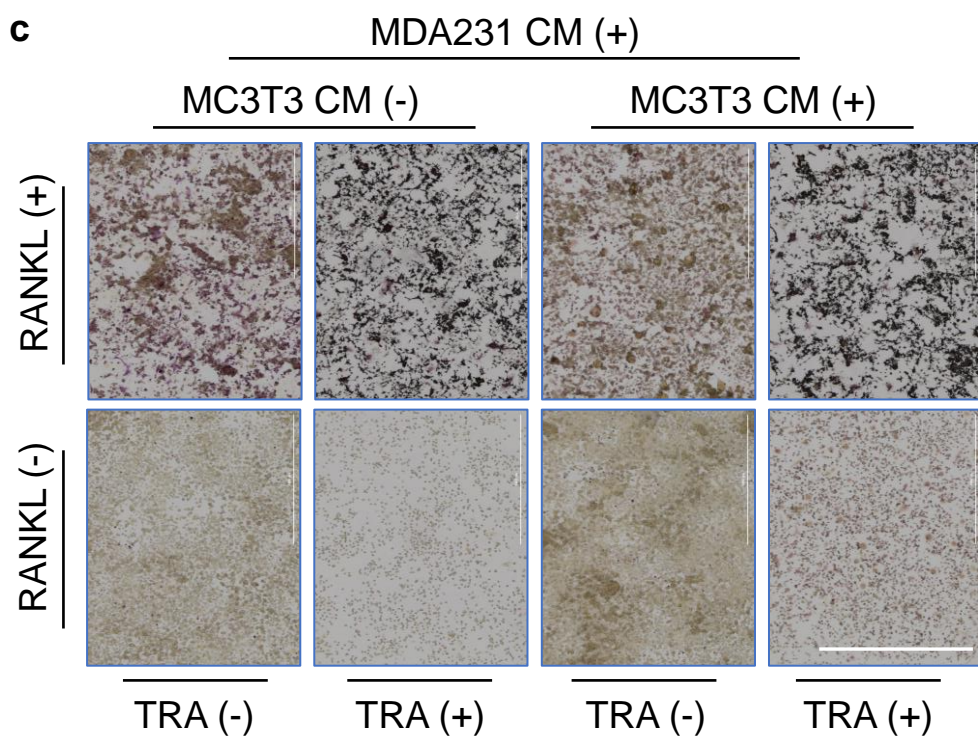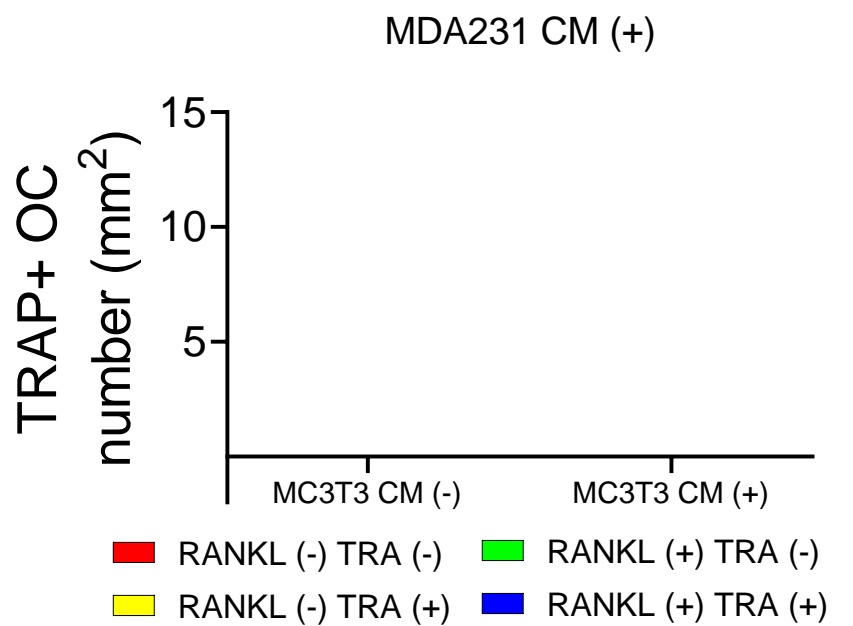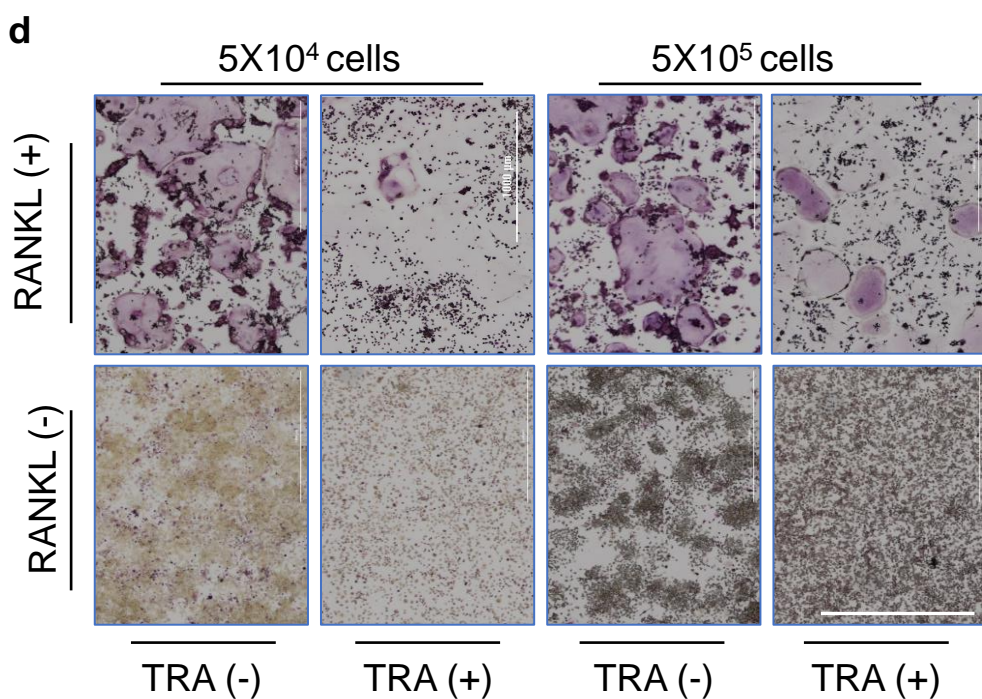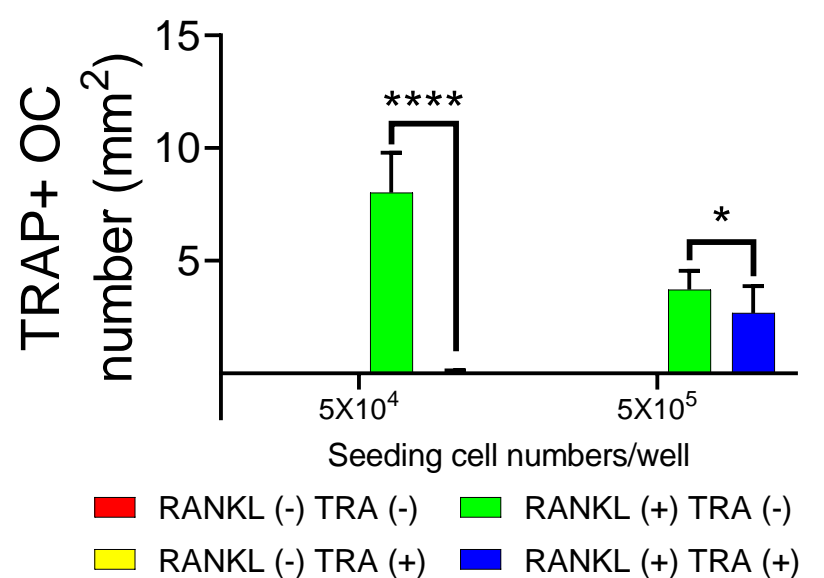

## Breast cancer cell lines (ATCC)

| Name       | ER                 | Histology                                             | Tumor Source                    | Mutant Gene                                                                                             | Morphology                         |
|------------|--------------------|-------------------------------------------------------|---------------------------------|---------------------------------------------------------------------------------------------------------|------------------------------------|
| MCF7       | ER positive        | Adenocarcinoma                                        | metastasis,<br>pleural effusion | CDKN2A (c.1_471del471),<br>PIK3CA (p.E545K)                                                             | Epithelial                         |
| HCC1806    | TRIPLE<br>NEGATIVE | Primary<br>acantholytic<br>squamous cell<br>carcinoma | primary                         | CDKN2A (c.1_471del471),<br>KDM6A (c.444_564del121),<br>STK11 (c.1109_1302del194),<br>TP53 (p.T256fs*90) | Basal-Like<br>Morphology           |
| MDA-MB-231 | TRIPLE<br>NEGATIVE | Adenocarcinoma                                        | metastasis,<br>pleural effusion | BRAF (p.G464V),<br>CDKN2A(c.1_471del471),<br>KRAS (p.G13D),<br>NF2 (p.E231* ),<br>TP53 (p.R280K )       | Mesenchymal-<br>Like<br>Morphology |
| MDA-MB-436 | TRIPLE<br>NEGATIVE | Adenocarcinoma                                        | metastasis,<br>pleural effusion | BRCA1(c.5277+1G>A),<br>RB1 (p.G203fs*9 )                                                                | Mesenchymal-<br>Like<br>Morphology |
| MDA-MB-157 | TRIPLE<br>NEGATIVE | Medullary<br>carcinoma                                | metastasis,<br>pleural effusion | NF1(p.S2751fs*27),<br>TP53 (p.A88fs*52 )                                                                | Mesenchymal-<br>Like<br>Morphology |
| Hs 578T    | TRIPLE<br>NEGATIVE | Carcinoma                                             | primary                         | CDKN2(c.1_471del471), HRAS<br>(p.G12D) ,<br>PIK3R1(p.N453_T454insN ), TP53<br>(p.V157F )                | Mesenchymal-<br>Like<br>Morphology |

| Well | Gene Symbol | Fold Difference |                   | Well | Gene Symbol | Fold Difference |                   |
|------|-------------|-----------------|-------------------|------|-------------|-----------------|-------------------|
|      |             | MDA231 /MCF7    | MDA231- /MEKi/Con |      |             | MDA231 /MCF7    | MDA231- /MEKi/Con |
| A01  | AIMP1       | 0.36            | 0.52              | D07  | CXCL9       | N.D             | N.D               |
| A02  | BMP2        | 25.07           | 0.19              | D08  | CXCR1       | 0.56            | N.D               |
| A03  | C5          | 0.93            | 0.88              | D09  | CXCR2       | 1.40            | 0.71              |
| A04  | CCL1        | N.D             | N.D               | D10  | FASLG       | N.D             | N.D               |
| A05  | CCL11       | N.D             | N.D               | D11  | IFNA2       | N.D             | N.D               |
| A06  | CCL13       | N.D             | N.D               | D12  | IFNG        | N.D             | N.D               |
| A07  | CCL15       | N.D             | N.D               | E01  | IL10RA      | 0.06            | N.D               |
| A08  | CCL16       | N.D             | N.D               | E02  | IL10RB      | 0.60            | 1.46              |
| A09  | CCL17       | 0.24            | N.D               | E03  | IL13        | 0.35            | 0.67              |
| A10  | CCL2        | 1.02            | 0.87              | E04  | IL15        | 3.12            | 1.28              |
| A11  | CCL20       | N.D             | 0.55              | E05  | IL16        | 0.27            | 0.91              |
| A12  | CCL22       | N.D             | N.D               | E06  | IL17A       | N.D             | N.D               |
| B01  | CCL23       | N.D             | N.D               | E07  | IL17C       | 0.05            | N.D               |
| B02  | CCL24       | N.D             | N.D               | E08  | IL17F       | 0.48            | N.D               |
| B03  | CCL26       | 1.04            | 1.95              | E09  | IL1A        | 0.50            | 0.56              |
| B04  | CCL3        | N.D             | N.D               | E10  | IL1B        | 89.20           | 0.13              |
| B05  | CCL4        | N.D             | N.D               | E11  | IL1R1       | 0.07            | 2.43              |
| B06  | CCL5        | 0.02            | 8.05              | E12  | IL1RN       | 0.02            | 0.87              |
| B07  | CCL7        | N.D             | N.D               | F01  | IL21        | 0.57            | N.D               |
| B08  | CCL8        | N.D             | N.D               | F02  | IL27        | 0.66            | 2.21              |
| B09  | CCR1        | 0.69            | 0.83              | F03  | IL3         | N.D             | N.D               |
| B10  | CCR2        | N.D             | 4.01              | F04  | IL33        | N.D             | N.D               |
| B11  | CCR3        | 2.11            | 0.68              | F05  | IL5         | 3.25            | 0.69              |
| B12  | CCR4        | N.D             | N.D               | F06  | IL5RA       | N.D             | N.D               |
| C01  | CCR5        | 1.33            | 5.07              | F07  | IL7         | 24.39           | 0.92              |
| C02  | CCR6        | 0.25            | N.D               | F08  | IL8         | 207.36          | 0.03              |
| C03  | CCR8        | N.D             | N.D               | F09  | IL9         | N.D             | N.D               |
| C04  | CD40LG      | N.D             | N.D               | F10  | IL9R        | N.D             | N.D               |
| C05  | CSF1        | 41.21           | 2.00              | F11  | LTA         | 1.31            | 0.90              |
| C06  | CSF2        | N.D             | N.D               | F12  | LTB         | 2.54            | 0.10              |
| C07  | CSF3        | 278.98          | 0.12              | G01  | MIF         | 0.61            | 0.45              |
| C08  | CX3CL1      | N.D             | N.D               | G02  | NAMPT       | 1.78            | 0.28              |
| C09  | CX3CR1      | N.D             | N.D               | G03  | OSM         | 0.66            | 0.93              |
| C10  | CXCL1       | 398.38          | 0.25              | G04  | SPP1        | 5.88            | 0.89              |
| C11  | CXCL10      | 0.17            | 0.79              | G05  | TNF         | 0.43            | N.D               |
| C12  | CXCL11      | 2.88            | 0.31              | G06  | OPG         | 0.49            | 0.84              |
| D01  | CXCL12      | N.D             | N.D               | G07  | TNFSF10     | 0.01            | 3.62              |
| D02  | CXCL13      | 0.71            | N.D               | G08  | RANKL       | N.D             | N.D               |
| D03  | CXCL2       | 654.39          | 0.32              | G09  | TNFSF13     | 0.19            | 1.68              |
| D04  | CXCL3       | 116.89          | 0.43              | G10  | TNFSF13B    | 0.32            | 3.25              |
| D05  | CXCL5       | 0.35            | 1.13              | G11  | TNFSF4      | 1.03            | 2.51              |
| D06  | CXCL6       | N.D             | N.D               | G12  | VEGFA       | 0.87            | 0.56              |



| Sample ID           | Phenotype    | Location | pERK1/2 <sup>+</sup> | p-CaMKII <sup>+</sup> | pAKT1 <sup>+</sup> | P-PKA <sup>+</sup> | pCREB <sup>+</sup> | P-NF-kB <sup>+</sup> | P-cMyc <sup>+</sup> | RANKL <sup>+</sup> |
|---------------------|--------------|----------|----------------------|-----------------------|--------------------|--------------------|--------------------|----------------------|---------------------|--------------------|
| <b>BCBM011316b</b>  | Osteolytic   | Femur    | ++/30%               | +++/50%               | -                  | +/10%              | ++/30%             | +/40%                | +++/90%             | ++/90%             |
| <b>BCBM012815b</b>  | Mixed        | Femur    | ++/60%               | +++/100%              | -                  | ++/100%            | ++/80%             | -                    | +++/90%             | ++/100%            |
| <b>BCBM012815S</b>  | Mixed        | Femur    | ++/25%               | +/80%                 | -                  | ++/40%             | +/10%              | ++/40%               | ++/60%              | ++/90%             |
| <b>BCBM020516</b>   | Mixed        | Femur    | +++/70%              | +/90%                 | +/-50%             | +/70%              | ++/60%             | +/30%                | +/20%               | +++/100%           |
| <b>BCBM022015B1</b> | Osteolytic   | Femur    | ++/10%               | ++/100%               | -                  | ++/100%            | +/25%              | +/60%                | +/-70%              | +++/100%           |
| <b>BCBM41316-A</b>  | Osteoblastic | Femur    | ++/70%               | ++/10%                | -                  | +++/80%            | ++/50%             | -                    | ++/80%              | +++/100%           |
| <b>BCBM072215T+</b> | Mixed        | Femur    | ++/60%               | +/100%                | -                  | ++/100%            | +/-40%             | -                    | ++/100%             | +/80%              |
| <b>BCBM111314-2</b> | Mixed        | Femur    | -                    | ++/20%                | -                  | ++/80%             | +++/40%            |                      |                     | ++/90%             |
| <b>Breastmet1</b>   | Osteolytic   | Femur    | ++80%                | ++/70%                | -                  | ++/70%             | ++/90%             | +++/50%              | ++/50%              | ++/90%             |
| <b>Breastmet2</b>   | Osteolytic   | Femur    | +++/60%              | +++/60%               | -                  | ++/60%             | +++/10%            | +++/70%              | ++/50%              | ++/80%             |
| <b>157283</b>       | Osteoblastic | Femur    | -                    | ND                    | ND                 | ND                 | -                  | ND                   | ND                  | ND                 |
| <b>157288</b>       | Mixed        | Femur    | +++/50%              | ND                    | ND                 | ND                 | ++/40%             | ND                   | ND                  | ND                 |
| <b>157291</b>       | Mixed        | Femur    | +++/80%              | ND                    | ND                 | ND                 | +++/70%            | ND                   | ND                  | ND                 |
| <b>157293</b>       | Osteoblastic | Femur    | +/10%                | ND                    | ND                 | ND                 | -                  | ND                   | ND                  | ND                 |
| <b>157289</b>       | Osteolytic   | Femur    | +/10%                | ND                    | ND                 | ND                 | +++/10%            | ND                   | ND                  | ND                 |
| <b>157297</b>       | Mixed        | Femur    | ++/80%               | ND                    | ND                 | ND                 | +/30%              | ND                   | ND                  | ND                 |
| <b>157300</b>       | Osteoblastic | Femur    | +++/100%             | ND                    | ND                 | ND                 | ND                 | ND                   | ND                  | ND                 |
| <b>157284</b>       | Mixed        | Femur    | ++/30%               | ND                    | ND                 | ND                 | -                  | ND                   | ND                  | ND                 |
| <b>157286</b>       | Osteolytic   | Femur    | ++/80%               | ND                    | ND                 | ND                 | +++/50%            | ND                   | ND                  | ND                 |

| Human        |                       | Mouse        |                      |
|--------------|-----------------------|--------------|----------------------|
| Primer Name  | Sequence (5' to 3')   | Primer Name  | Sequence (5' to 3')  |
| hACKR1-F624  | GCAGGCCACACACTGTAG    | mACKR1-F678  | CAAGGGGCTGAAGATAGCAC |
| hACKR1-R824  | AACAGCAACAGCTTGGACCT  | mACKR1-R867  | GGCTTCTGTCCATTTCAGCA |
| hACKR2-F344  | TCTTGTGCAAGATGGTGAGC  | mACKR2-F177  | CTCCGTAGTTGTGGCGATTT |
| hACKR2-R541  | CCATATCAGGGATGGAGACG  | mACKR2-F630  | CTCCAGCTGAACCTTCTGG  |
| hACKR3-F277  | GTTGTCTCACCATCCCAGT   | mACKR2-R324  | GCCTAGAATCCATCCGTGAA |
| hACKR3-R416  | CTCATGCACGTGAGGAAGAA  | mACKR2-R823  | GCAACGAGTGCAGAAACAAG |
| hACKR4-F153  | TTTCGTCATTGGACTTGCAG  | mACKR3-F633  | CATGGAGCTGGTCTCTGTCA |
| hACKR4-R302  | GCATTAACAGCCAAAAAGG   | mACKR3-R796  | GCCAACATACCAGGAAGACC |
| hADIPOQ-F47  | ATGACCAGGAAACCAAGACT  | mADIPOQ-F9   | GTGCAAGCTCTCCTGTTCC  |
| hADIPOQ-R244 | CACCGATGTCTCCCTTAGGA  | mADIPOQ-R202 | TCTCTCCAGGAGTGCCATCT |
| hAMH-F576    | CACCCGCTACCTGGTGTAG   | mAMH-F544    | CAGAACCTCTGCCCTACTCG |
| hAMH-R738    | GGTCATCCGTGTGAAGCAG   | mAMH-R710    | CGGGAATCAGAGCCAAATAG |
| hBDNF-F164   | GCTTGACATCATTGGCTGAC  | mBDNF-F79    | GCGCCCATGAAAGAAGTAAA |
| hBDNF-R320   | AGAAGAGGAGGCTCCAAAGG  | mBDNF-R234   | TTCCGATGACGTGCTCAAAG |
| hBMP10-F546  | CATGCTGGTCTTGGTGTCTG  | mBMP10-F1047 | CCGGGGTGTGTGTAAGTACC |
| hBMP10-R747  | ATGCTTATTCTGGGCACTGG  | mBMP10-R1248 | AGACACAGCCATCCCTTCAT |
| hBMP1-F702   | TTCCATCGTTCTGTGAGAACA | mBMP1-F828   | CTATGCCCGGAACACATTCT |
| hBMP1-R885   | CACCCCGTTCCACTCATACT  | mBMP1-R1004  | GTGCTGTCTTGGAGGGTCTC |
| hBMP2-F413   | CTATCCCCACGGAGGATTT   | mBMP2-F619   | GCTCCACAAACGAGAAAAGC |
| hBMP2-R590   | ACCAACCTGGTGTCCAAAAG  | mBMP2-R996   | AGCAAGGGGAAAAGGACACT |
| hBMP3-F1137  | TGCAGATATTGGCTGGAGTG  | mBMP3-F500   | TCCTCAAATCCAACCAAAGC |
| hBMP3-R1317  | TGGTACACAGCAAGGCTCAG  | mBMP3-R682   | TCCTCTTGGGTAGCTCGTGT |
| hBMP4-F296   | TCCACAGCACTGGTCTTGAG  | mBMP4-F716   | TGACTCACCTCCACCAGACA |
| hBMP4-R443   | GGGATGCTGTGTGAGGTTAAA | mBMP4-R888   | ATGCTTGGGACTACGTTTGG |
| hBMP5-F255   | CAATGCCATGACCAATGAAG  | mBMP5-F1193  | ACCATGCCATAGTCCAGACC |
| hBMP5-R425   | AGAGGAGGACTCTGGGTGGT  | mBMP5-R1359  | GCAGCCACACGAACGTACTA |
| hBMP6-F1300  | AAGGGCTATGCTGCCAATTA  | mBMP6-F534   | CTCCTTGAACCGCAAGAGTC |
| hBMP6-R1465  | GAACCGAGATGGCATTAGC   | mBMP6-R683   | TGTGGGAGAACTCCTTGTG  |
| hBMP7-F416   | TCGTGGAACATGACAAGGAA  | mBMP7-F726   | GGGCTTACAGCTCTCTGTGG |
| hBMP7-R578   | CTGATCCGGAACGTCTCATT  | mBMP7-R873   | CCGGATACTACGGAGATGGA |
| hBMP8B-F853  | CTCCAGGGATCTTTGATGA   | mBMP8B-F1037 | CTATGCAGGCCCTGGTACAT |
| hBMP8B-R1003 | AGCACTCCCCCTCACAGTAA  | mBMP8B-R1186 | AGGCCTGGACTACCATGTTG |
| hC5AR1-F840  | GCTGGACTCCCTGTGTGTCT  | mC5AR1-F499  | CTCACCATTCCATCCTTCGT |
| hC5AR1-R991  | CCCTAACCCAGGACTTTCA   | mC5AR1-R653  | GTGACAGAGGCAACACAAA  |
| hC5-F1087    | CTGAAGCCTGGGATTCCATA  | mC5-F681     | TGTCTTGCCACGATTCTCTG |
| hC5-R1287    | CGTCACTCCAGATGGGAGAT  | mC5-R877     | GTGTGGCTTTGTGCATCATC |
| hCCL1-F72    | GAGCATGCAGGTACCCTTCT  | mCCL1-F74    | GCATGCTTACGGTCTCCAAT |
| hCCL1-R217   | AGGCCTCTTTGCCTCTCTTC  | mCCL1-R232   | TAGTTGAGGCGCAGCTTTCT |
| hCCL2-F89    | TCAGCCAGATGCAATCAATG  | mCCL2-F129   | CCAATGAGTAGGCTGGAGA  |
| hCCL2-R223   | AGATCTCCTTGGCCACAATG  | mCCL2-R284   | ATTTGGTTCCGATCCAGGTT |
| hCCL3-F53    | GCAACCAGTTCTCTGCATCA  | mCCL3-F98    | CCTGCTGCTTCTCTACAGC  |
| hCCL3-R207   | GCTTCGCTTGGTTAGGAAGA  | mCCL3-R247   | CTTGGACCCAGGTCTCTTTG |
| hCCL4-F10    | TGCGTGACTGTCTGTCTCT   | mCCL4-F89    | CTCCACTTCTGCTGTTTC   |
| hCCL4-R146   | ACCACAAAGTTGCGAGGAAG  | mCCL4-R237   | CTCACTGGGTTAGCACAGA  |
| hCCL5-F24    | CGCTGTCATCCTATTGCTA   | mCCL5-F20    | CCCTCACCATCATCCTCACT |
| hCCL5-R173   | GAGCACTTGCCACTGGTGTA  | mCCL5-R171   | GCATTGCTGCTGGTGTAGA  |
| hCCL7-F1     | ATGAAAGCCTCTGCAGCACT  | mCCL7-F85    | AATGCATCCACATGCTGCTA |
| hCCL7-R150   | GCTCTCCAGCCTCTGCTTAG  | mCCL7-R254   | ATAGCCTCCTCGACCCACTT |
| hCCL8-F84    | TTCCATTCCAATCACCTGCT  | mCCL8-F50    | TCAGCCAGAGAAGCTGACT  |
| hCCL8-R232   | GGTCAGCACAGACCTCCTTG  | mCCL8-R196   | TCTGGAACACACAGCTTCC  |
| hCCL11-F75   | AGCTTCTGTCCCAACCACCT  | mCCL11-F36   | CAGGGTCACTTCTTCACT   |
| hCCL11-R214  | TATCCTTGGCCAGTTTGGTC  | mCCL11-R187  | CTATGGCTTTCAGGGTGCAT |
| hCCL13-F86   | CTTACCACCCCTCAGAGTGC  |              |                      |
| hCCL13-F87   | CGTCCATCTACTTGTGCT    |              |                      |
| hCCL13-R233  | GGGTTGGTACAGACGGAATG  |              |                      |
| hCCL13-R240  | CTTCTCCTTTGGTCAAGC    |              |                      |
| hCCL15-F141  | TCACTTTGCTGCTGACTGCT  |              |                      |
| hCCL15-R291  | ACTGGGTTTGGCACAGACTT  |              |                      |
| hCCL16-F162  | CAGAAAGGCCCTCAACTGTC  |              |                      |
| hCCL16-R307  | TGGACAAGTTCCTGGTAGGC  |              |                      |
| hCCL17-F47   | CTTCTCTGCAGCACATCCAC  | mCCL17-F65   | TGCTTCTGGGGACTTTTCTG |
| hCCL17-R209  | CTGCCCTGCACAGTTACAAA  | mCCL17-R211  | CATCCCTGGAACACTCCACT |
| hCCL18-F83   | AGCTCTGCTGCCTCGTCTAT  |              |                      |
| hCCL18-R232  | CCCACTTCTTATTGGGGTCA  |              |                      |
| hCCL19-F95   | CTGTGACCCAGAAACCCATC  | mCCL19-F141  | GAAAGCCTTCCGCTACCTTC |
| hCCL19-R252  | CTGGATGATGCGTTTACCC   | mCCL19-R304  | TGCTGTTGCCTTTGTTCTTG |
| hCCL20-F79   | GCAAGCAACTTTGACTGCTG  | mCCL20-F249  | CACCCAGTTCTGCTTTGGAT |
| hCCL20-R228  | ATTTGCGCACACAGACAAT   | mCCL20-F93   | CGACTGTTGCCTCTCGTACA |
| hCCL21-F30   | TATCCTGGTTCTGGCCTTTG  | mCCL21-F222  | ATGTGCAACCCCTGAGGAAG |
| hCCL21-R170  | CAGCCTAAGCTTGGTTCTCTG | mCCL21-F399  | TCCTCTTGGGGCTGTGTCT  |
| hCCL22-F16   | ACTGCACTCCTGGTTGTCT   | mCCL22-F40   | CTTCTTGTGTGGCAATTCA  |
| hCCL22-R180  | GCAGGAGTCTGAGGTCCAGT  | mCCL22-R219  | TCGGTTCTTGACGGTTATCA |
| hCCL23-F202  | AGTGCTGACTGCTGCATCTC  |              |                      |
| hCCL23-R382  | GCTTCAGCACTTCTCATGCAA |              |                      |
| hCCL24-F75   | CTCTGTGGTCAATCCCTCTC  | mCCL24-F77   | CTGTGACCATCCCTCATCT  |
| hCCL24-R254  | TACCTCTGGACCCACTCCTG  | mCCL24-R258  | TATGTGCTCTGAACCCACA  |
| hCCL25-F212  | ACAGGAAGGTGTGTGGGAAC  | mCCL25-F173  | GCAACCTACGTGCTGTGAGA |
| hCCL25-R409  | TACTGCTGCTGATGGGATTG  | mCCL25-R359  | GGGTTCTCCACCTTGGACTT |
| hCCL26-F42   | CCTCCTGAGTCTCCACTTTG  | mCCL26-F23   | TTGTTCTCTGGCCATCTTC  |
| hCCL26-R176  | TGGGAGCAGCTGTACTGGT   | mCCL26-R176  | TCACTGGTGCAGCTCTTGTC |
| hCCL27-F55   | CCAGACCCTACAGCAGCATT  |              |                      |
| hCCL27-R201  | GAAAGCCTGGAGGTGACAGT  |              |                      |
| hCCL28-F160  | GCTGATGGGAAATGTGACTT  | mCCL28-F226  | CCGCACAATCGTACTTTGAA |
| hCCL28-R324  | CCTGTGGCAACATTTCTT    | mCCL28-R375  | CCTGTGTGTTCCAGTGTTC  |
| hCCR1-F571   | AGCCTGAAGCAGTGAAGAG   | mCCR1-F521   | CCAATGGGAATTCCTCAC   |
| hCCR1-R771   | CAGATTGTAGGGGTCCAGA   | mCCR1-R720   | CAAACGGACAGCTTTGGATT |
| hCCR2-F681   | AAGGTTTCAGGGAGCAGAGGT | mCCR2-F539   | TGGCTGTGTTTGCCTCTTA  |
| hCCR2-F806   | AGGAATTCTTCGGCCTGAGT  | mCCR2-F680   | TGAGGAGAAGGCAGAGCTTC |
| hCCR2-R1004  | GGACCTCCACACACTGGTTT  | mCCR2-R738   | CCTACAGCAAAACAGGGTGT |
| hCCR2-R818   | TTGCAGTCACTCAGGGAGAA  | mCCR2-R828   | CTCATCCTGCAGGGACAAGT |
| hCCR3-F445   | TTGGTGTCACTACCAGCAT   | mCCR3-F295   | CTGTGGAATGAGTGGGGTTT |
| hCCR3-R638   | AGCAGAGGGAGAACCAGACA  | mCCR3-R493   | CAAGGCCCCAGGTAATGATA |
| hCCR4-F874   | CTGGCTTTTGTTCAGTCTG   | mCCR4-F778   | GTGGTGTCTTCTCTGGAGAC |
| hCCR4-R1040  | TAAGATGAGCTGGGGTGTCT  | mCCR4-R949   | GGGTGATGTACTTGGGGAAT |
| hCCR5-F409   | TTAAAAGCCAGGACGGTAC   | mCCR5-F875   | GCTGCCTAAACCCTGTCATC |
| hCCR5-R612   | GACCAGCCCAAGATGACTA   | mCCR5-R1042  | GTTCTCCTGTGGATCGGGTA |
| hCCR6-F929   | GCCTGAACCCTGTGCTCTAC  | mCCR6-F270   | CCTACCGTTCTGGGCAGTTA |
| hCCR6-R1095  | ATCTGCGGTCTCACTGGTCT  | mCCR6-R438   | GAAAGATTTGGTTGCCTGGA |
| hCCR7-F230   | GGCTGGTCTGTGTTGACTAT  | mCCR7-F226   | AACGGGCTGGTGATACTGAC |
| hCCR7-R432   | CATGCCACTGAAGAAGCTCA  | mCCR7-R430   | TCCCGCTGAAGAAGCTTAAC |
| hCCR8-F163   | CTGGTCACTCTGGTCTTGT   | mCCR8-F529   | GGCATGCTACAATGTTCCA  |

| Primer Name                       | Sequence (5 to 3)                               |
|-----------------------------------|-------------------------------------------------|
| Dominant Negative MEK1 mutant     |                                                 |
| DNMEK1-Gibson-up                  | TCTGGCCTGGTCATGGCCAGAATGCTAATTCATCTGGAGATCAA    |
| DNMEK1-Gibson-down                | TTTGATCTCCAGATGAATTAGCATTCTGGCCATGACCAGGCCAGA   |
| Constitutively Active MEK1 mutant |                                                 |
| ActMEK1-Gibson-up                 | GGGCAGCTCATCGACGAGATGGCCAACGATTCGTGGGCACAAGGTCC |
| ActMEK1-Gibson-down               | GGACCTTGTGCCACGAAATCGTTGGCCATCTCGTCGATGAGCTGCC  |
| pLJM1-RFP-MEK1                    |                                                 |
| EGFP-DsRED2_fwd2                  | tagcgctaccggctgccaccATGGCCTCCTCCGAGGACGT        |
| hMEK1-DsRED2_rev2                 | gtcggcttcttcttgggcatGGCGCCGGTGGAGTGGCGGC        |
| pLJM1-hMEK1_rev                   | gctcgagatctgagtccggaTTAGACGCCAGCAGCATGGG        |
| DsRED2-hMEK1_fwd2                 | gcccactccaccggcgccATGCCAAGAAGAAGCCGAC           |
| pLJM1-DsRED2-hMEK1-1095F          | cccatgctgctggcgtctaaTCCGGACTCAGATCTCGAGCTCAAG   |
| pLJM1-EGFP-DsRED2-377R2           | acgtcctcgaggaggccatGGTGGCGACCGGTAGCGCTA         |
